# Supplementary material
Source: PubMed Central journal article supplement (PMC7179307)
Supplement: AAC.01404-19-s0001.pdf [file AAC.01404-19-s0001.pdf]

### DMSO-high vs Untreated

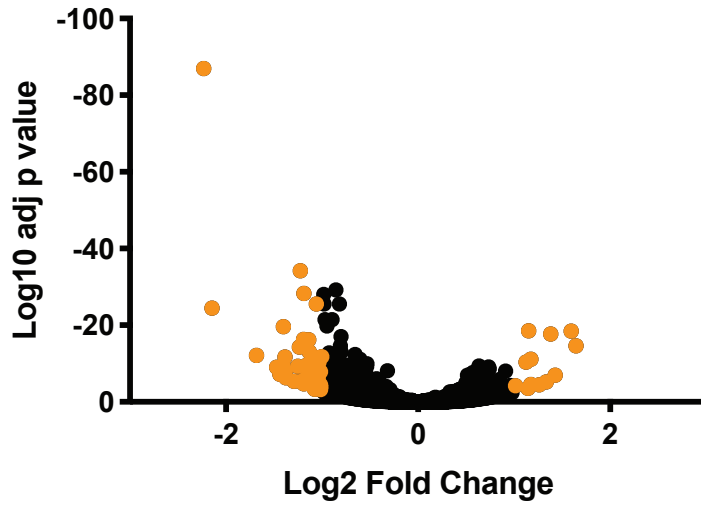

Figure S1: DMSO-high treatment altered gene expression significantly over untreated monolayers.

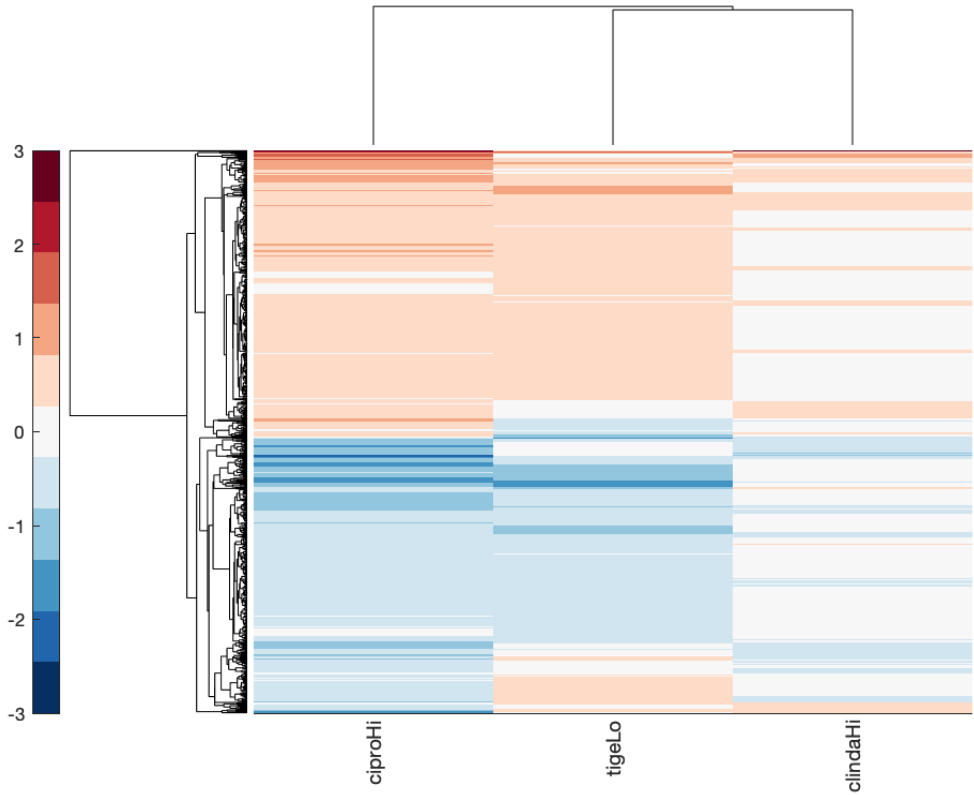

**Figure S2:** Unsupervised hierarchical clustering of 606 genes with statistically significant gene expression changes across at least 2 treatment groups.

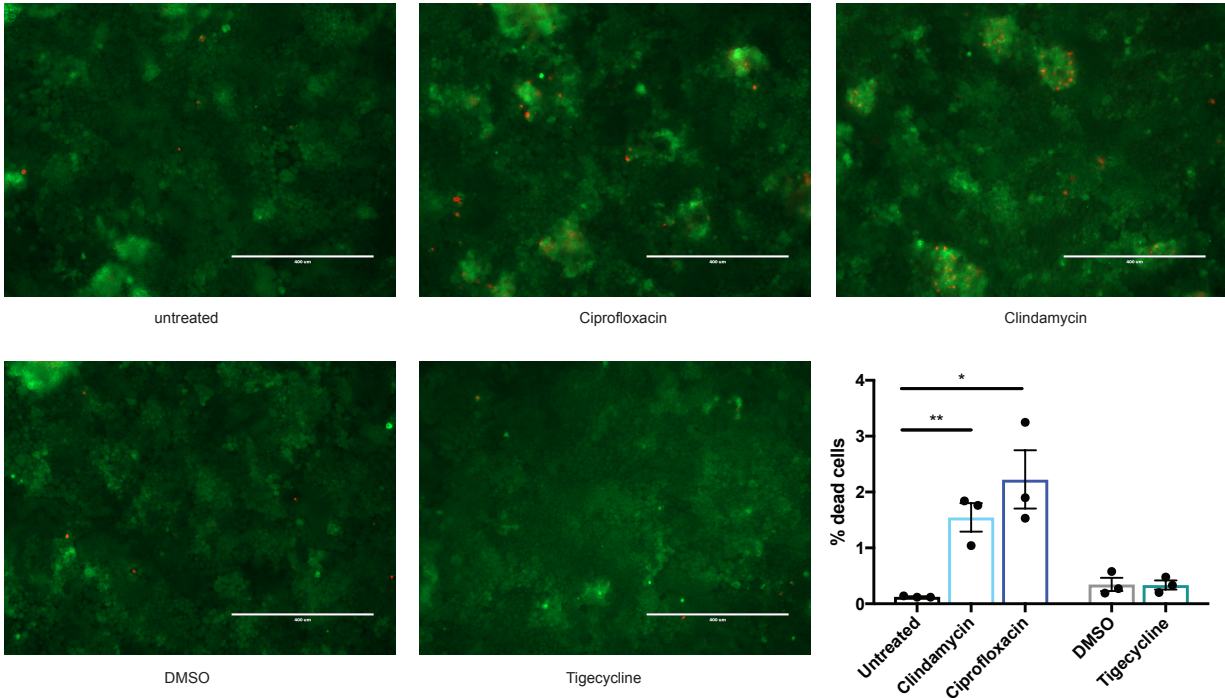

**Figure S3:** Increased epithelial death with CDAD-associated antibiotic treatment. Representative images with quantification of images. n=3, 5 fields of view per sample, significance by student's t test \*<0.05, \*\*<0.01. Scale bar 400um.

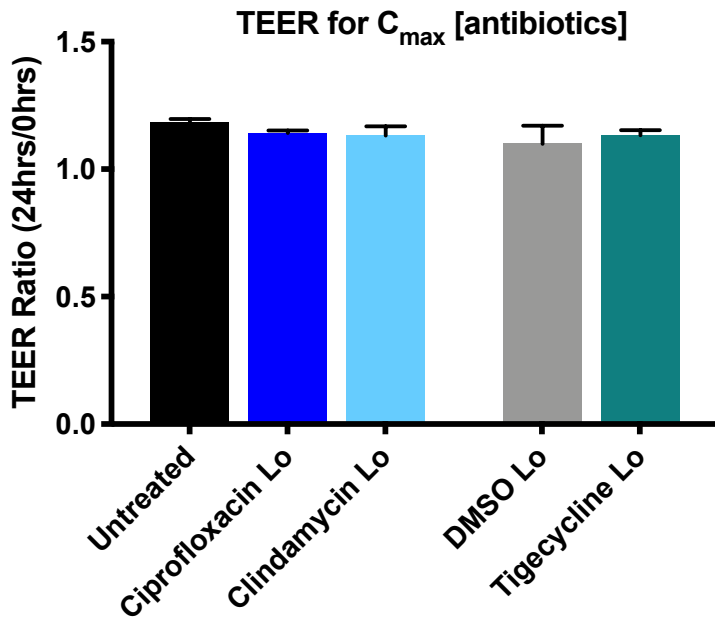

**Figure S4:** TEER values are unaffected by antibiotic treatment.

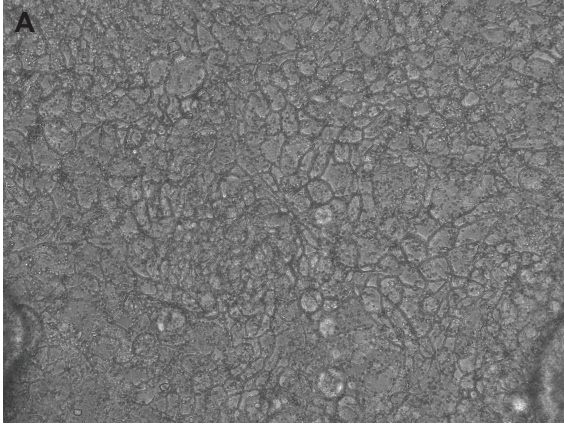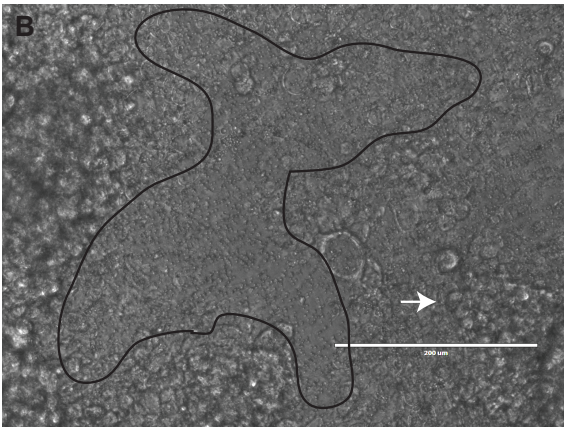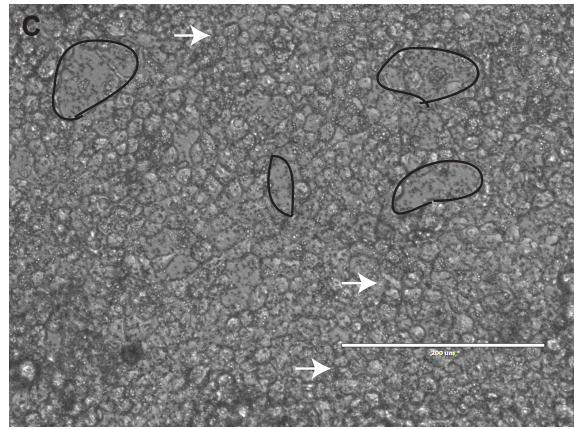

**Supplemental Figure 5.** A) Untreated mucosal barrier, 10X. B, C) Mucosal barrier treated with *C. difficile* spent media for 48hrs. Typical toxin-induced phenotypes are visible: cell death (outlined in black) and rounding (arrowheads). Scale bars 200µm.
